# Supplementary material for: Exploring the Influence of Zinc Ions on the Conformational Stability and Activity of Protein Disulfide Isomerase
Source: MDPI journal article supplement (doi:10.3390/ijms25042095), 2024-02-08
Supplement: s1 [file s1]

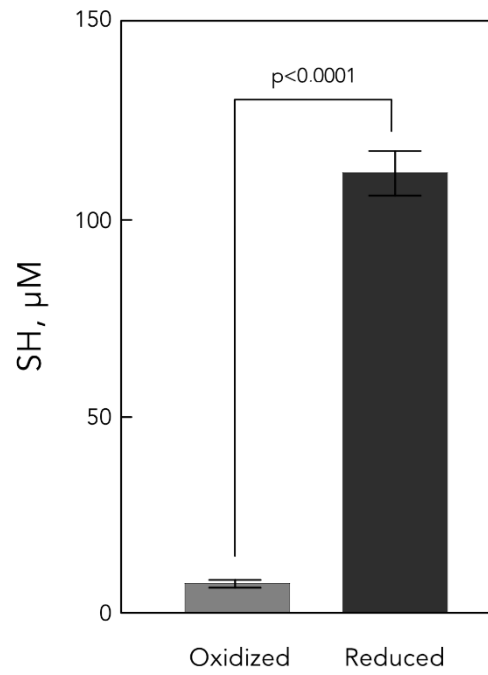

**Figure S1: Analysis of free thiols on PDI in distinct redox states.** DTNB measurements were used to assess free thiols on the oxidized and reduced forms of 20 μM PDIA1. Six independent experiments were performed in triplicate. Data represent mean  $\pm$  SEM;  $n=6$ .
